# Supplementary material for: Coacervate Thermoresponsive Polysaccharide Nanoparticles as Delivery System for Piroxicam
Source: PubMed Central journal article supplement (PMC7767055; doi:10.3390/ijms21249664), 2020-12-18
Supplement: ijms-21-09664-s001.pdf [file ijms-21-09664-s001.pdf]

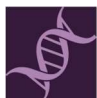

Supplementary

# Coacervate Thermoresponsive Polysaccharide Nanoparticles as Delivery System for Piroxicam

Dorota Lachowicz <sup>1,\*</sup>, Agnieszka Kaczyńska <sup>2</sup>, Anna Bodzon-Kulakowska <sup>3</sup>, Anna Karewicz <sup>2</sup>, Roma Wirecka <sup>1,4</sup>, Michał Szuwarzyński <sup>1</sup> and Szczepan Zapotoczny <sup>2</sup>

<sup>1</sup> Academic Centre for Materials and Nanotechnology, AGH University of Science and Technology, al. A. Mickiewicza 30, 30-059 Krakow, Poland; roma.wirecka@gmail.com (R.W.); szuwarzy@agh.edu.pl (M.S.)

<sup>2</sup> Faculty of Chemistry, Jagiellonian University, Gronostajowa 2, 30-387 Krakow, Poland; agnieszka.kaczynska01@gmail.com (A.K.); karewicz@chemia.uj.edu.pl (A.K.); zapotocz@chemia.uj.edu.pl (S.Z.)

<sup>3</sup> Department of Analytical Chemistry and Biochemistry, Faculty of Materials Science and Ceramics, AGH University of Science and Technology, al. A. Mickiewicza 30, 30-059 Krakow, Poland; anna.bodzon-kulakowska@agh.edu.pl

<sup>4</sup> Faculty of Physics and Applied Computer Science, AGH University of Science and Technology, al. A. Mickiewicza 30, 30-059 Krakow, Poland

\* Correspondence: [dorota.bielska@agh.edu.pl](mailto:dorota.bielska@agh.edu.pl)

Received: 18 November 2020; Accepted: 15 December 2020; Published: date

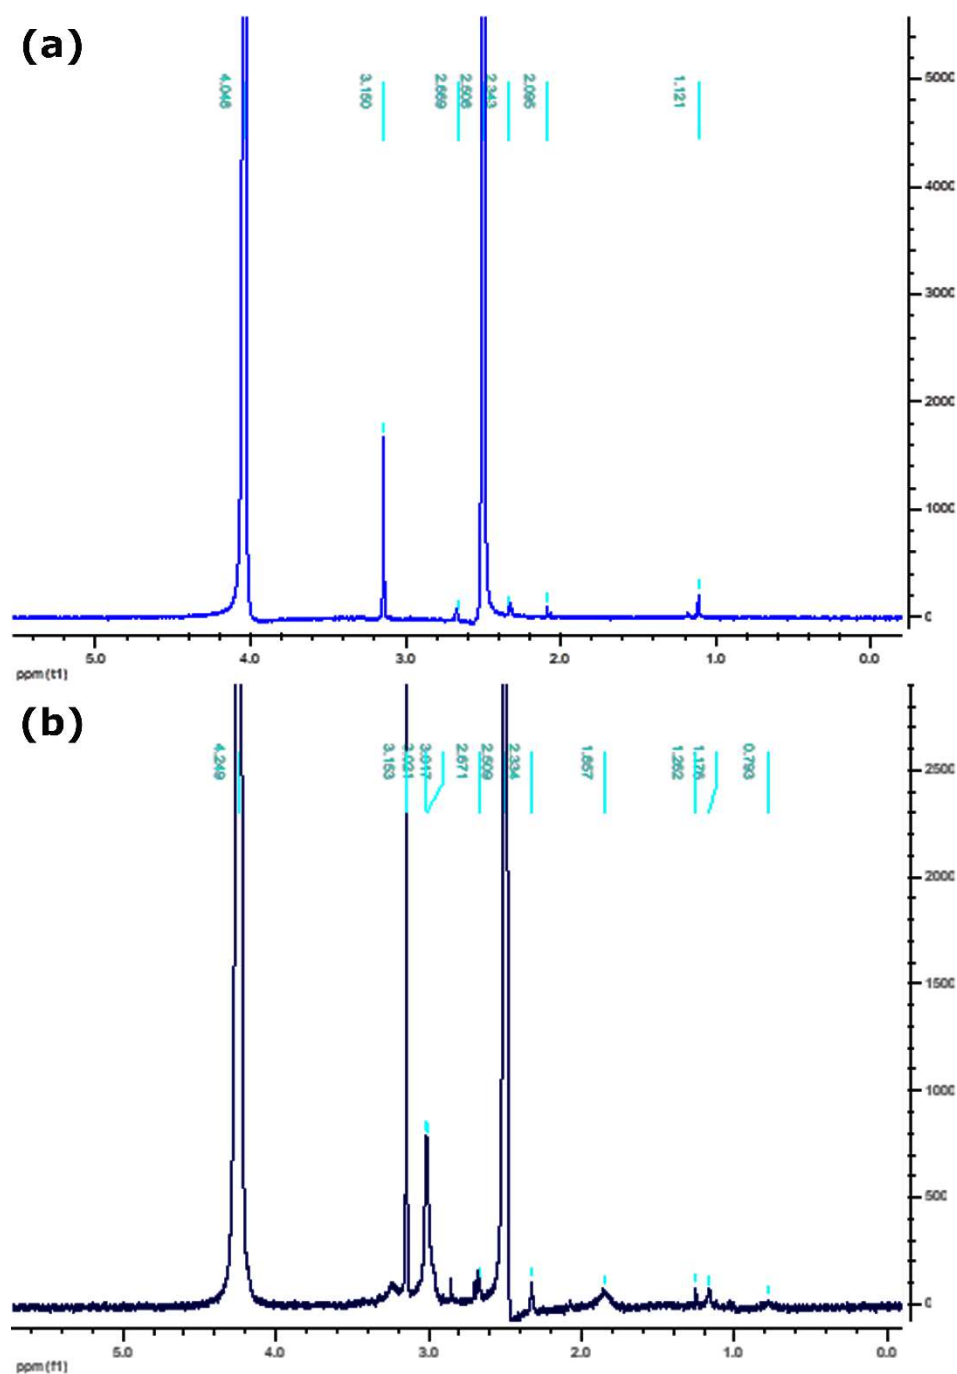

Figure S1.  $^1\text{H}$ -NMR spectra of CUR (a) and C-CUR (b) ( $c = 1.5 \text{ mg/mL}$  in  $\text{D}_2\text{O}$ )

Table S1. Substitution degrees for the cationic curdlan (C-CUR).

| Material | Degree of substitution (DS %)<br>(based on $^1\text{H}$ NMR spectrum) | Degree of substitution (DS %)<br>(based on conductivity<br>measurements - Cho method) |
|----------|-----------------------------------------------------------------------|---------------------------------------------------------------------------------------|
| C-CUR    | $8.9 \pm 1.98$                                                        | $11.2 \pm 1.11$                                                                       |

Table S2. Substitution degrees for the anionic hydroxypropylcellulose (A-HPC).

| Material | Degree of substitution (DS %)<br>(based on elemental analysis) | Degree of substitution (DS %)<br>(based on XPS spectrum) |
|----------|----------------------------------------------------------------|----------------------------------------------------------|
| A-HPC    | $29.0 \pm 9.81$                                                | $19.2 \pm 2.21$                                          |

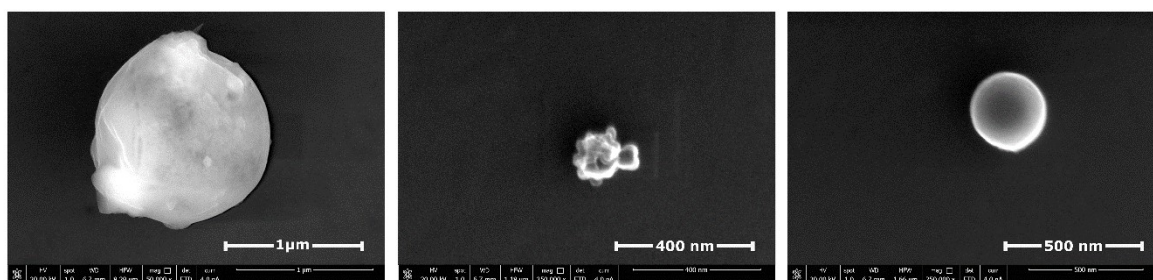

**Figure S2** SEM images of the particles obtained for various C-CUR/A-HPC compositions. From the left: C-CUR/A-HPC ratio of: 1:1, 1:10 and 1:25.
